# Supplementary material
Source: publisher site journal article supplement (https://www.spandidos-publications.com/8523/downloadSupplementary)
Supplement: Supplementary file 1 [file downloadSupplementary]

## Sheet: Table SI
Table SI. Substrate proteins for FAM20C.
Name of the substrate proteins	Corresponding genes	Sites for phosphorylation
Disintegrin and metalloprotease domain-containing protein 10	ADAM10	T719
Alpha-fetoprotein	AFP	S111, S115, S117, S344, S444, S445
Alpha-2-HS-glycoprotein	AHSG	S135, S138, S328, S330
Serum albumin	ALB	S29, S82, S91, T109
Anoctamin-8	ANO8	S801
Amyloid-like protein2	APLP2	S590
Apolipoprotein A2	APOA2	S54, S68
Apolipoprotein A-V	APOA5	T55
Apolipoprotein B	APOB	S4048
Apolipoprotein E	APOE	S147
Apolipoprotein L1	APOL1	S327, S330, S352, S355
Amyloid beta A4 protein	APP	S385, S441
Bone morphogenic protein 4	BMP4	S91
BPI fold-containing family B member 2	BPIFB2	T52, S60
Complement C3	C3	S38, S70, S297, S303, S672, S968, S1321, S1573
Isoform 2 of Complement C4-A	C4A	S918
Calumenin, Isoform 4	CALU	S77
Cadherin-2	CDH2	S96, S135
Secretogranin 1	CHBG	S130, S225, S367, S377, S380, Y401
Chordin-like 1	CHRDL1	S186
Cytoskeleton-associated protein 4	CKAP4	S232
Ceruloplasmin	CP	S722
Macrophage colony stimulating factor 1	CSF1	T266
Cystatin-C	CST3	S43
Insulin-like growth factor-binding protein 10	CYR61	S188
DnaJ homolog subfamily C member 3	DNAJC3	S274
Fam176A (Protein eva-1 homolog A)	EVA1A	S114
Coagulation factor V	F5	S859
Fibrillin-1	FBN1	S2702
Fibrinogen alpha chain	FGA	S45, S56, S364, S524, S560, S609
Fibrinogen gamma chain	FGG	S68
Fibronectin, isoform 1	FN1	S2384, S2475
Fibronectin, isoform 15	FN15	S2475
Follistatin-related protein 1	FSTL1	S165
Follistatin-related protein 3	FSTL3	S255
Plasma alpha-L-fucosidase	FUCA2	S301
Growth arrest-specific protein 6	GAS6	S71
Golgi membrane protein	GOLM1	S309
Glypican 3	GPC3	S352
Histidine rich calcium binding protein	HRC	T76, S119, S145, S358, S409, S431, S494, S567
Endoplasmin	HSP90B1	S306
Insulin-like growth factor binding protein 1	IGFBP1	S45, S156, T157, Y158, T193, S194, S199, S242
Insulin-like growth factor binding protein 3	IGFBP3	S148
Insulin-like growth factor-binding protein 3	IGFBP3	S201
Insulin-like growth factor-binding protein 4	IGFBP4	S255
Insulin-like growth factor-binding protein 5	IGFBP5	S116
Insulin-like growth factor-binding protein 7	IGFBP7	S239
Interleukin-6	IL6	S81
Inter-alpha-trypsin inhibitor H2	ITIH2	S60, S466, S886
Kininogen-1	KNG1	S332
Kinectin	KTN1	S75
Laminin subunit beta-1	LAMB1	S1502, S1520, S1690, S1706
Laminin subunit beta-2	LAMB2	S1532
Laminin subunit gamma-1	LAMC1	S1149
Galectin-1	LGALS1	S30
Isoform 3 of Latent-transforming growth factor beta-binding protein 1	LTBP1	S1035
Matrillin-3	MATN3	S441, T442
Membrane-bound transcription factor site-1 protease	MBTPS1	S168
Lactadherin	MFGE8	S42
Melanotransferrin	MFI2	S462
Alpha-1,3-mannosyl-glycoprotein 4-beta-N-acetylglucosaminyltransferase A	MGAT4A	S474
Melanoma inhibitory activity protein	MIA3	S226, S229, S1906
Isoform 3 of Mesothelin	MSLN	S200
Isoform 2 of matrix-remodeling-associated protein 8	MXRA8	S228
Protein notum homolog	NOTUM	S81
Nucleobindin-1	NUCB1	S86, S369, T148
Proprotein convertase subtilisin type 9	PCSK9	S47, S688
Protein disulfide isomerase A1	PDIA1	S208
Protein disulfide isomerase A6	PDIA6	S357
Patatin-like phospholipase domain-containing protein 2	PNPLA2	S404
Glucosidase 2 subunit beta	PRKCSH	S24, S168
Vitamin K-dependent protein C	PROC	S347
Serine protease 23	PRSS23	S109
Sulfhydryl oxidase 1	QSOX1	S426
Reticulocalbin-1	RCN1	S80
Syndecan-2	SDC2	S115
Alpha-1-anti-trypsin	SERPINA1	S38
Protein Z-dependent protease inhibitor	SERPINA10	S56
Antithrombin III	SERPINC1	T63, S68
Heparin cofactor 2	SERPIND1	S37
Shisa-5	SHISA5	S115
Testican	SPOK2	S72
Osteopontin	SPP1	S26, S27
Stanniocalcin	STC2	S250, S251, T254
Serotransferrin	TF	S389, S685
Trans-Golgi network integral membrane protein 2	TGOLN2	S71, S221, S298, T302, S351
Metalloproteinase inhibitor 1	TIMP1	S178
Transmembrane Protein 132A	TMEM132A	S530
Tenascin	TNC	S72
Versican core protein	VCAN	S2116
Neurosecretory protein VGF	VGF	S420, T424
Von Willebrand factor A domain-containing protein 1	VWA1	S74, S80, Y83, S93
Wolframin	WFS1	T30, S32

## Sheet: Table SII
Table SII. Substrate proteins for DIPK2A.
Name of the substrate proteins	Corresponding genes	Sites for phosphorylation
ADP-ribosylation factor-like protein 6-interacting protein 4	ARL6IP4	S332
BCL2/adenovirus E1B 19 kDa protein-interacting protein 3-like	BNIP3L	S120
Calnexin	CANX	S564
Coiled-coil domain-containing protein 8	CCDC8	S261
Cyclin-dependent kinase 13	CDK13	S383
Coatomer subunit alpha	COPA	S137
N-acetyltransferase ESCO2	ESCO2	S75
Golgi reassembly-stacking protein 2	GORASP2	S222
Heat shock 70 kDa protein 1B	HSPA1B	S631
Pinin	PNN	S100, S381
RB1-inducible coiled-coil protein 1	RB1CC1	S222
GTP-binding protein SAR1a	SAR1A	S139
Sec1 family domain-containing protein 1	SCFD1	S303
Serine incorporator 1	SERINC1	S364
Adenosine 3'-phospho 5'-phosphosulfate transporter 1	SLC35B2	S427
Serine/arginine repetitive matrix protein 2	SRRM2	S2694
Serine/threonine-protein kinase TNNI3K	TNNI3K	S637
Dual specificity protein kinase TTK	TTK	S281
Nuclease-sensitive element-binding protein 1	YBX1	S174

## Sheet: Table SIII
Table SIII. Substrate proteins for PKDCC.
Name of the substrate proteins	Corresponding genes	Sites for phosphorylation
Proadrenomedullin	ADM	Y52
Angiopoietin-related protein 5	ANGPTL5	Y165
Retina-specific copper amine oxidase	AOC2	Y488
Amyloid beta A4 protein	APP	Y588
Calumenin	CALU	Y275
Protein canopy homolog 2	CNPY2	Y71
Protein canopy homolog 3	CNPY3	Y110
Collagen alpha-1(I) chain	COL1A1	Y1215, Y1216
Cysteine-rich with EGF-like domain protein 2	CRELD2	Y68
Endoplasmic reticulum resident protein 29	ERP29	Y64, Y66
Endoplasmic reticulum resident protein 44	ERP44	Y395
Follistatin-related protein 1	FSTL1	Y286, Y251
Polypeptide N-acetylgalactosaminyltransferase 5	GALNT5	Y68
Neutral alpha-glucosidase AB	GANAB	Y363
Golgi integral membrane protein 4	GOLIM4	Y107, Y379
HLA class I histocompatibility antigen	HLA-A	Y31, Y195
78 kDa glucose-regulated protein	HSPA5	Y65, Y635
Insulin-like growth factor-binding protein 10	IGFBP10	Y221
Insulin-like growth factor-binding protein 3	IGFBP3	Y190
Insulin-like growth factor-binding protein 7	IGFBP7	Y201
Galectin-3-binding protein	LGALS3BP	Y446
Alpha-2-macroglobulin receptor-associated protein	LRPAP1	Y336
Lysozyme-like protein 1	LYZL1	Y106
Mesencephalic astrocyte-derived neurotrophic factor	MANF	Y76
LDLR LRP6 chaperone MESD would lock into open confirmation 2RQM	MESD2	Y588
Alpha-1,6-mannosyl-glycoprotein 2-beta-N-acetylglucosaminyltransferase	MGAT2	Y301
Melanoma inhibitory activity protein 3	MIA3	Y969
Multiple inositol polyphosphate phosphatase 1	MINPP1	Y46
Nucleobindin-1	NUCB1	Y179
Nucleobindin-2	NUCB2	Y169
Prolyl 4-hydroxylase subunit alpha-2	P4HA2	Y79
Collagen prolyl 4-hydroxylase beta	P4HB	Y94, Y268
Protein disulfide-isomerase A3	PDIA3	Y100, Y445
Group XIIA secretory phospholipase A2	PLA2G12A	Y130
Peroxiredoxin-4	PRDX4	Y266
Serine protease 23	PRSS23	Y131
Reticulocalbin-1	RCN1	Y115, Y190
Secretogranin-2	SCG2	Y457
Epsilon-sarcoglycan	SGCE	Y38
VPS10 domain-containing receptor SorCS2	SorCS2	Y746, Y574
Osteopontin	SPP1	Y165
Transmembrane emp24 domain-containing protein 10	TMED10	Y135
Protein kinase domain-containing protein, cytoplasmic	VLK	Y64

## Sheet: Table SIV
Table SIV. Substrate proteins for SPKKPs in exosomes of various tumors.
Tumor Type	Substrate	SPKKPs
Breast Cancer	ADAM10	FAM20C
Colorectal Cancer	PNN	DIPK2A
	QSOX1	FAM20C
Endometrial Cancer	LGALS3BP	PKDCC
Gastric Cancer	MATN3	FAM20C
Hepatocellular Carcinoma	GOLM1	FAM20C
	FN1	FAM20C
Hodgkin Lymphoma	ADAM10	FAM20C
Lung Cancer	AHSG	FAM20C
	CKAP4	FAM20C
	MFGE8	FAM20C
	FN1	FAM20C
Neuroblastoma	MINPP1	PKDCC
Ovarian Cancer	SPP1	PKDCC
Pancreatic Cancer	APOA2	FAM20C
	APOB	FAM20C
	APOE	FAM20C
	CKAP4	FAM20C
